# Supplementary material
Source: Research Square preprint supplement (doi:10.21203/rs.3.rs-9612727/v1)
Supplement: Supplementary file 1 [file b371cb35add4ba427b3da984.docx]

| 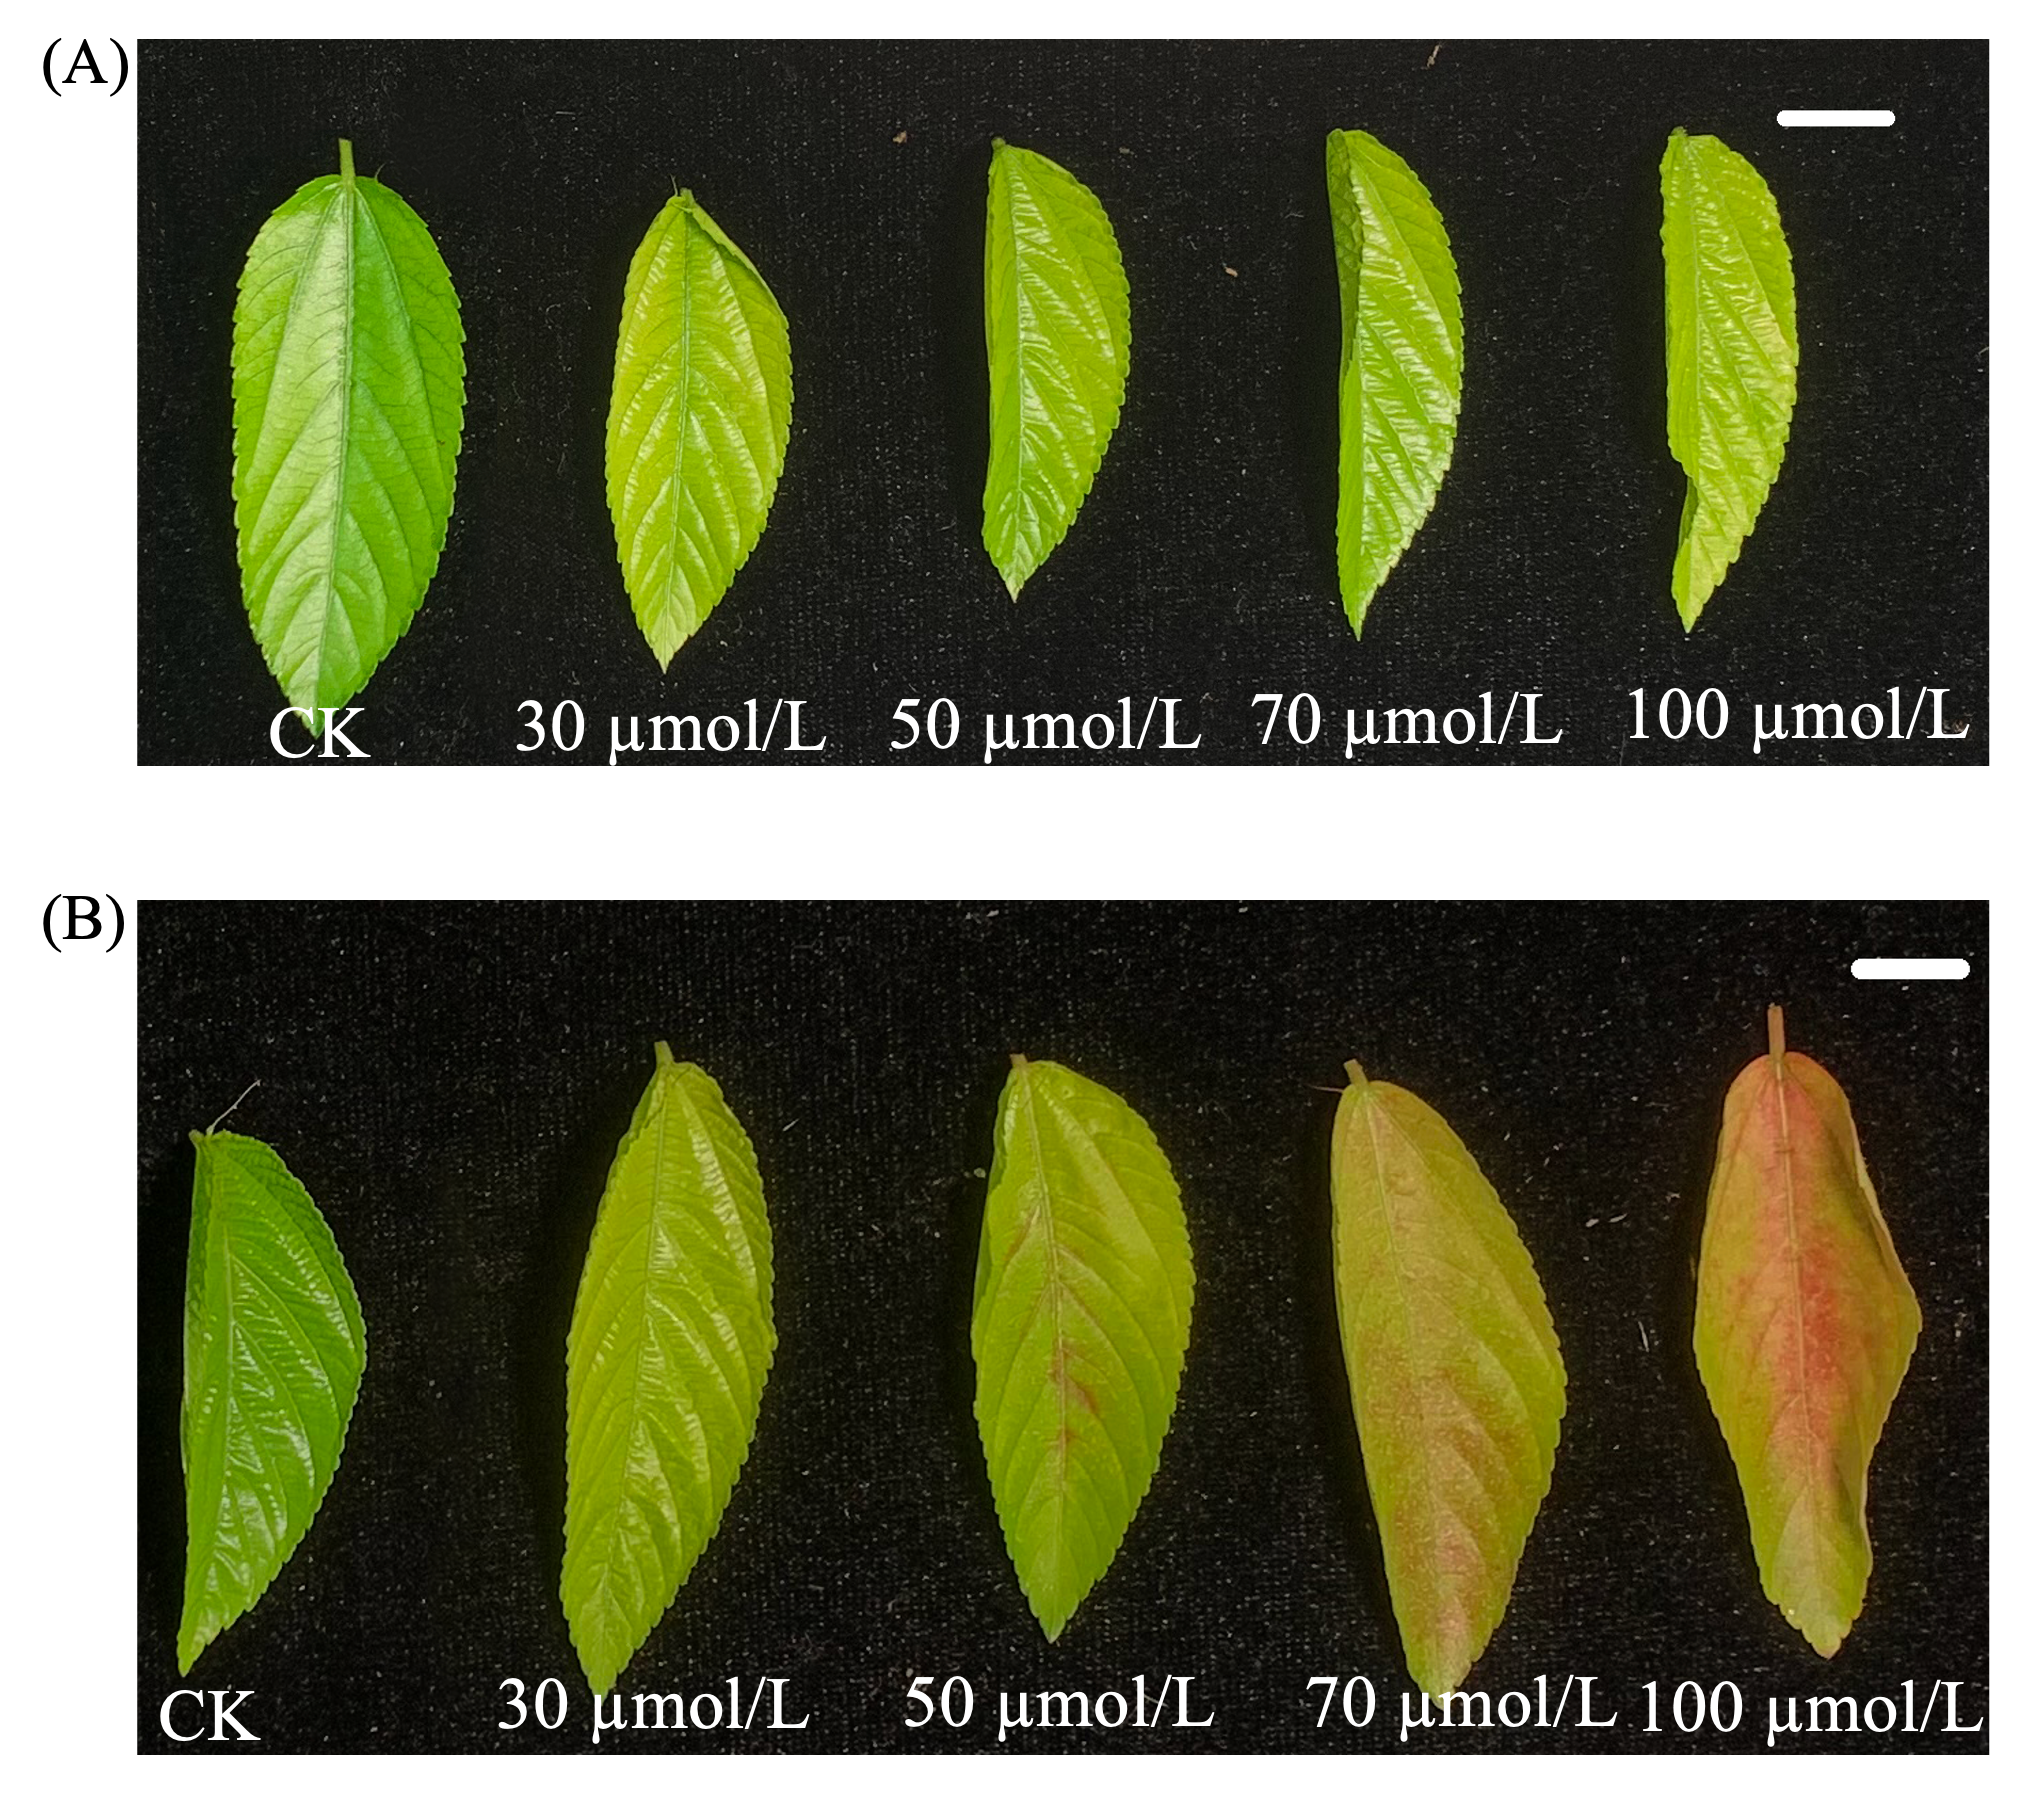 |
| --- |

Fig. S1 Leaf phenotype responses of two dark jute parental lines under a cadmium concentration gradient.
(A) CO57 and (B) CO83 leaves after exposure to Cd (0, 30, 50, 70, and 100 μmol/L); representative leaves show Cd-induced color changes relative to the control (CK).

| 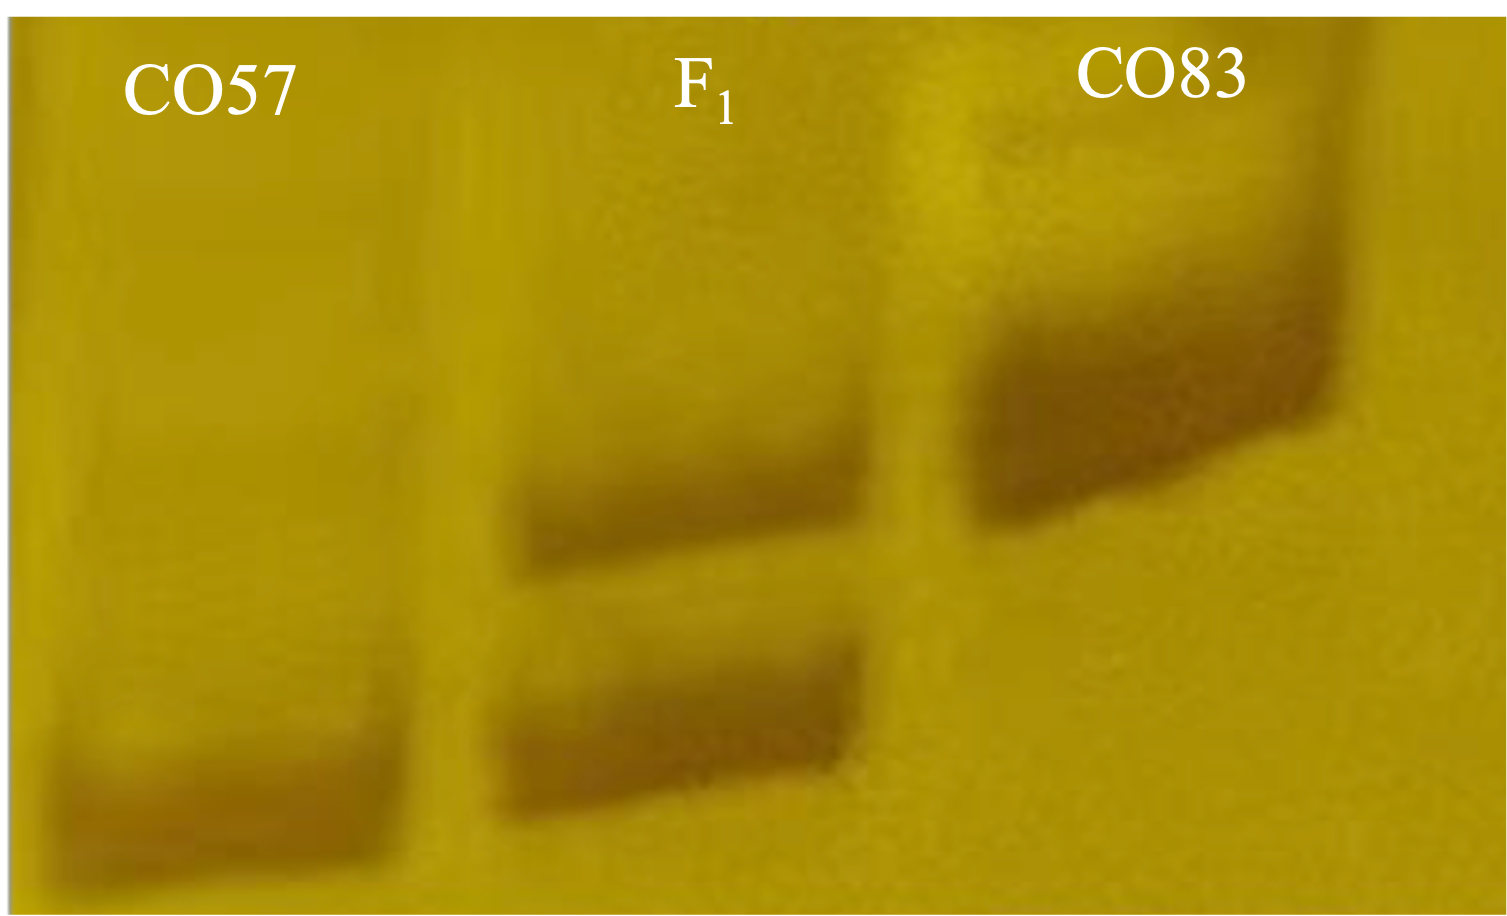 |
| --- |

Fig. S2 Confirmation of F₁ hybridization between CO57 and CO83.
Representative marker banding patterns for CO57, the F₁ individual, and CO83 showing the F₁ carries parental alleles consistent with successful hybridization.

| 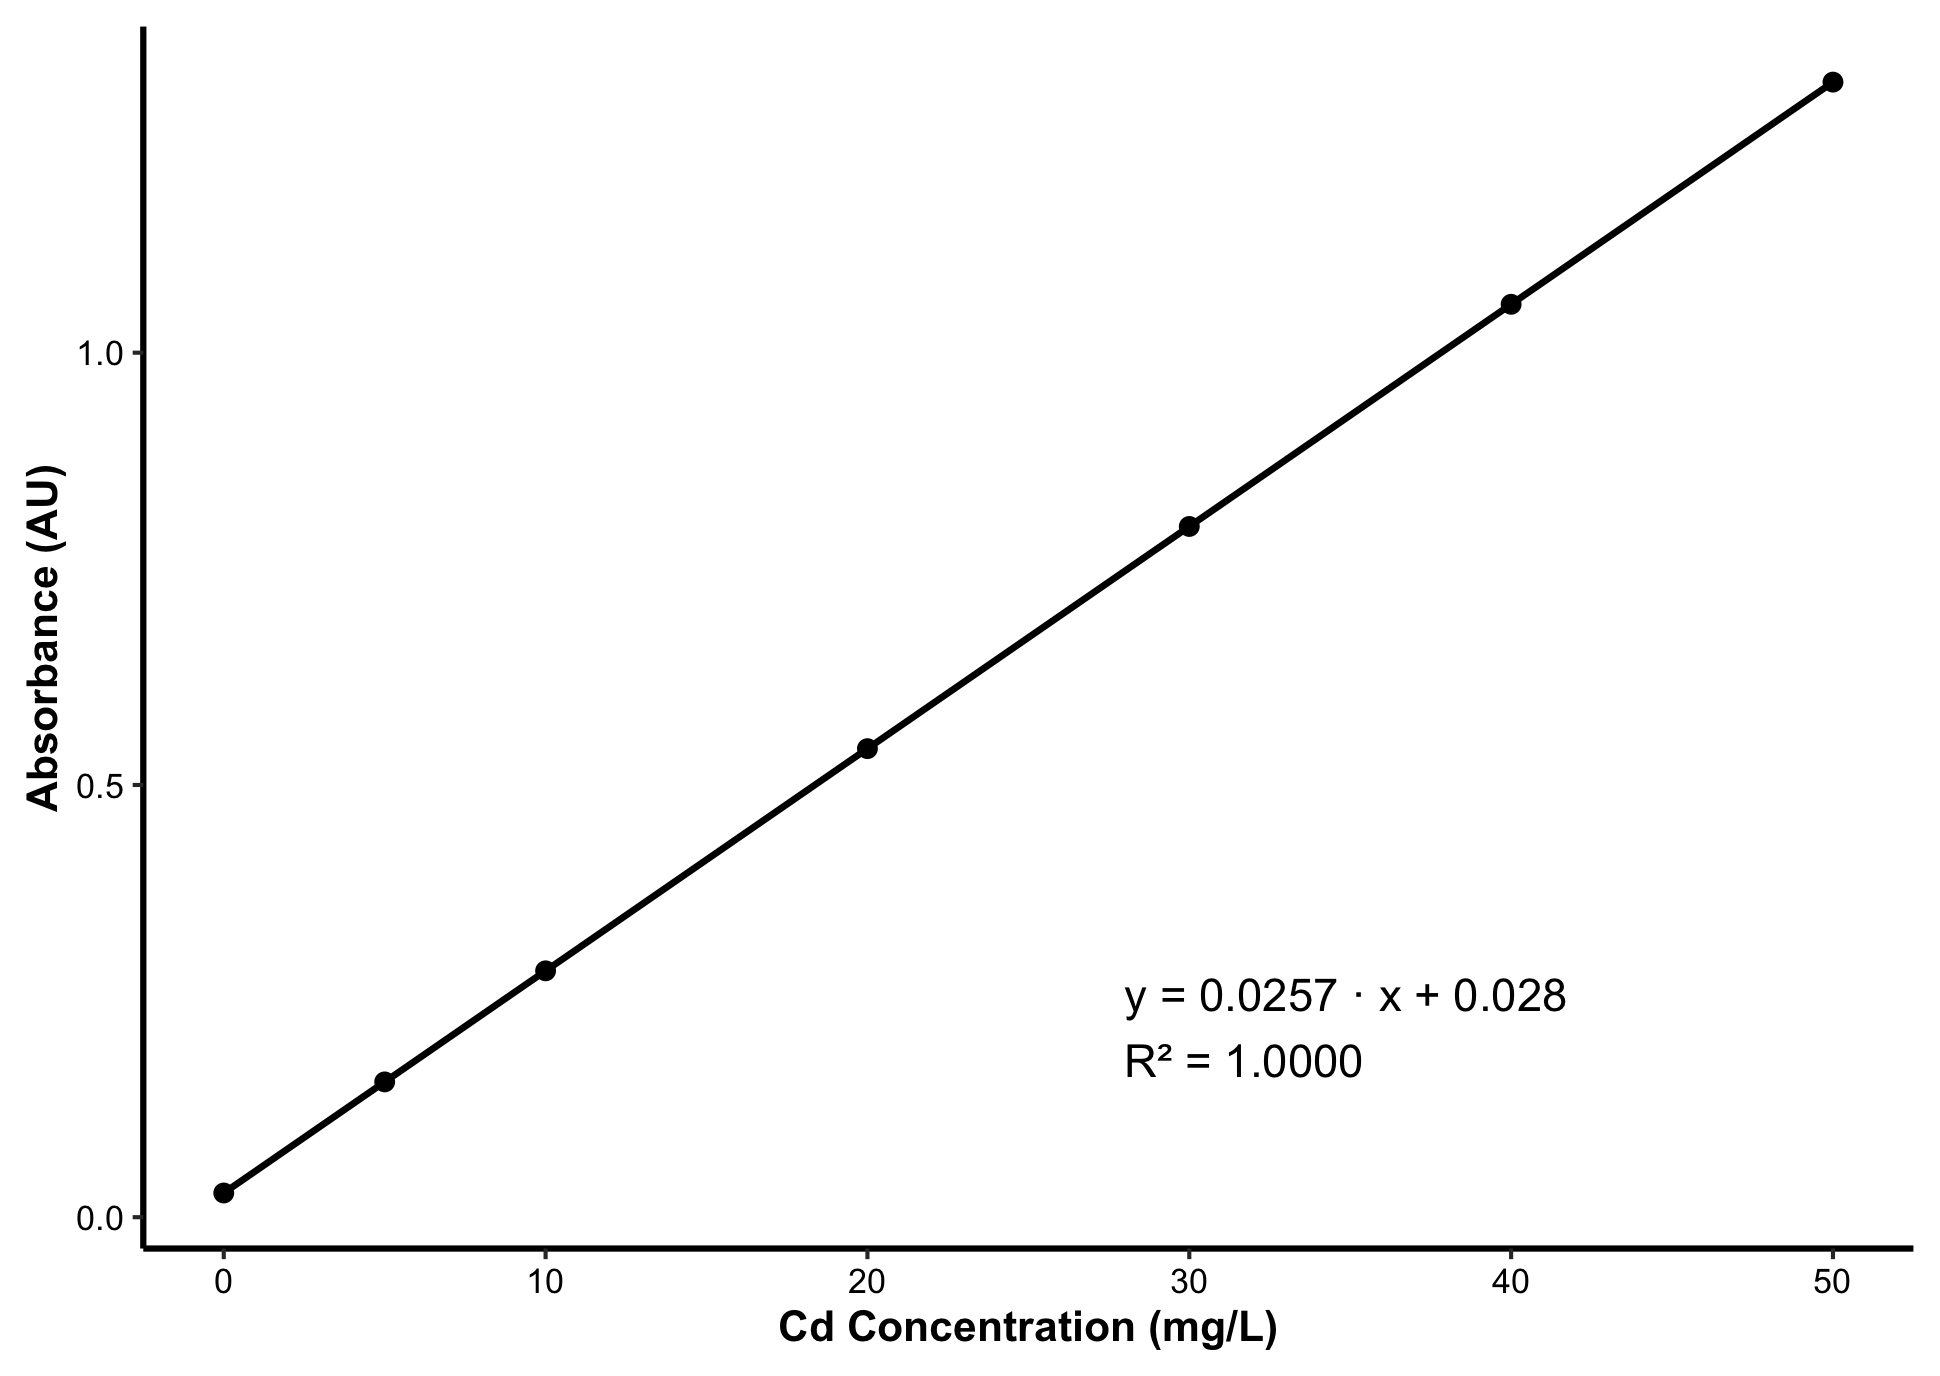 |
| --- |

Fig. S3 **Calibration curve for cadmium (Cd) quantification.**Standard curve generated using Cd standard solutions across concentration gradients for ICP-OES measurement.

| 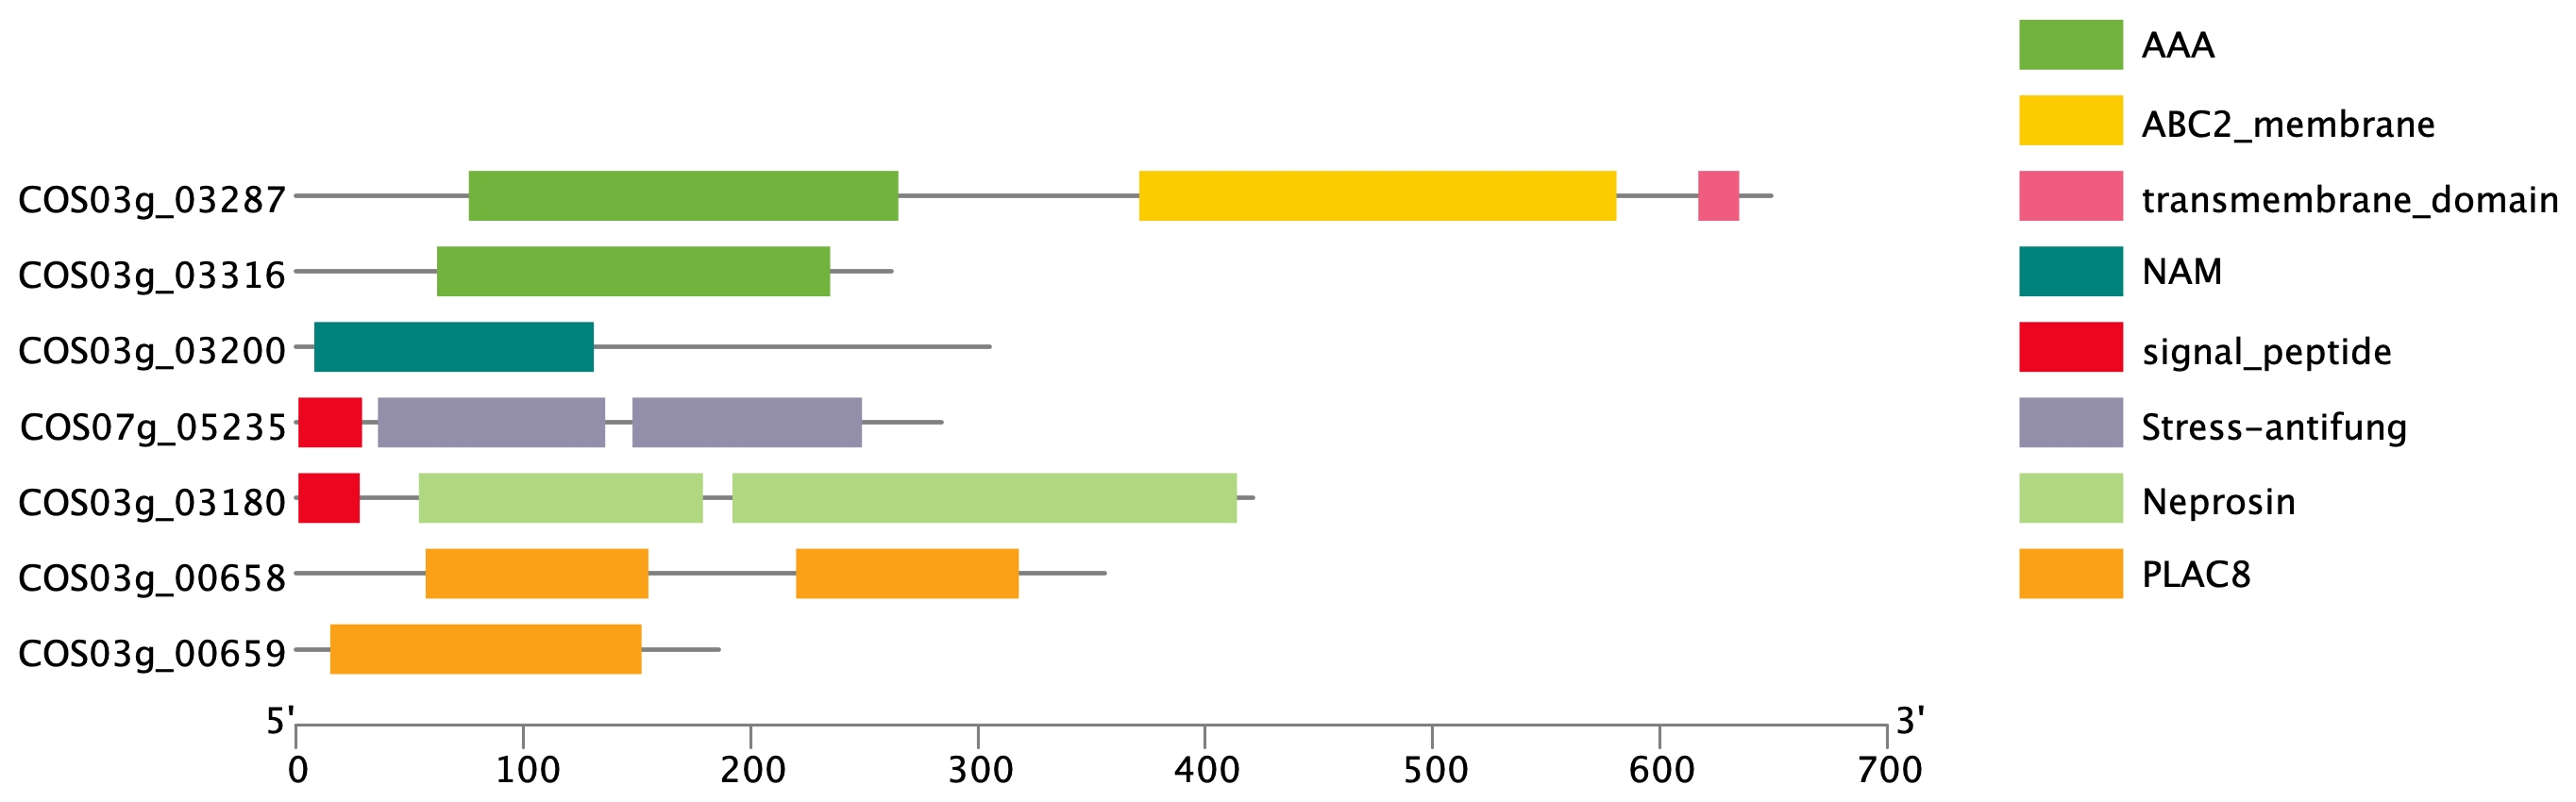 |
| --- |

Fig. S4 Conserved domain architectures of prioritized candidate proteins predicted by NCBI Batch CD-Search.
